# Supplementary material for: Synthesis of Dimpled Particles by Seeded Emulsion Polymerization and Their Application in Superhydrophobic Coatings
Source: MDPI journal article supplement (doi:10.3390/membranes12090876), 2022-09-11
Supplement: s1 [file s1]

*Supplementary material for*

# Synthesis of Dimpled Particles by Seeded Emulsion Polymerization and Their Application in Superhydrophobic Coatings

Likui Wang <sup>1,†</sup>, Florian Ion Tiberiu Petrescu <sup>2,†</sup>, Jing Liu <sup>1</sup>, Hongping Li <sup>1</sup> and Gang Shi <sup>1,\*</sup>

<sup>1</sup> The Key Laboratory of Synthetic and Biological Colloids, Ministry of Education, School of Chemical and Material Engineering, Jiangnan University, Wuxi 214122, China

<sup>2</sup> Department of Mechanisms and Robots Theory, Bucharest Polytechnic University, 060042 Bucharest, Romania

\* Correspondence: gangshi@jiangnan.edu.cn

† These authors contributed equally to this work.

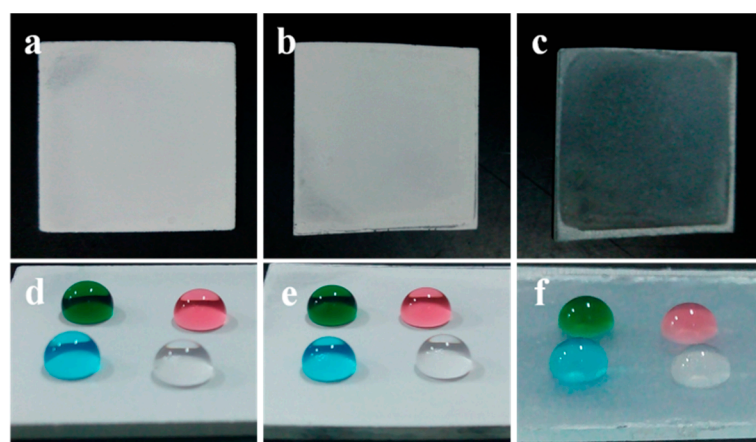

**Figure S1.** Digital photos of glass slides coated with PS/P(OFMA-S) composite particles annealed at different annealing temperatures for 15 min and their static hydrophobic performances: (a,d) 60 °C; (b,e) 90 °C; (c,f) 120 °C.

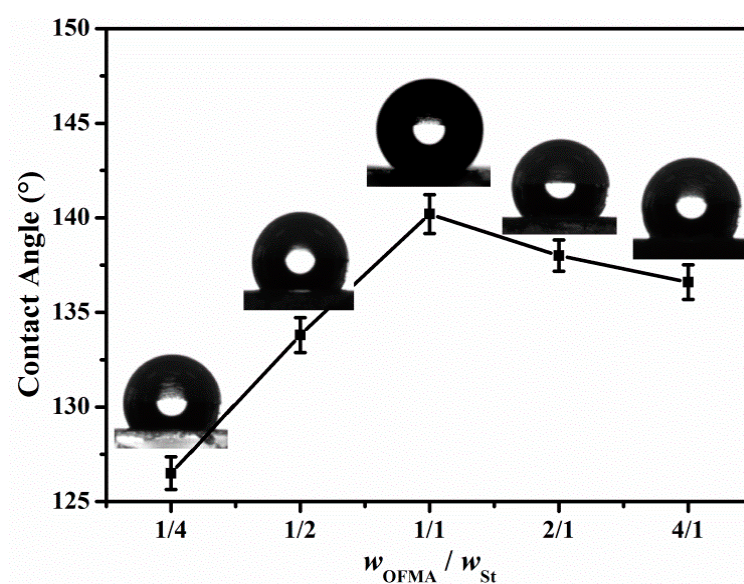

**Figure S2.** Water contact angles of coatings with PS/P(OFMA-S) composite particles obtained with different  $w_{\text{OFMA}}/w_{\text{St}}$  of 1/4, 1/2, 1/1, 2/1 and 4/1.
